# Supplementary material for: Facile synthesis of hierarchical hollow MoS2 nanotubes as anode materials for high-performance lithium-ion batteries
Source: Royal Society of Chemistry journal article supplement (doi:10.1039/c4ce01493f), 2014-01-01
Supplement: c4ce01493f1.pdf [file c4ce01493f1.pdf]

## Facile synthesis of hierarchical hollow MoS<sub>2</sub> nanotubes as anode material for high-performance lithium-ion batteries

Guangda Li,<sup>a</sup> Xiaoying Zeng,<sup>b</sup> Tiandong Zhang,<sup>b</sup> Wanyong Ma,<sup>a</sup> Wenpeng Li,<sup>a</sup> and Meng Wang,<sup>\*b</sup>

<sup>a</sup> School of Chemistry and Pharmaceutical Engineering, Qilu University of Technology, Jinan 250353, China. Fax: +86 531 89631070; Tel: +86 531 89631075; E-mail: ligd@qlu.edu.cn

<sup>b</sup> Hongyunhonghe Technology Center, Tobacco Yunnan Industrial Co., Ltd, Kunming 650202, China. Fax: +86 871 65869555; Tel: +86 871 65869555; E-mail: wangm\_chemistry@sina.com

Table S1. Cycling performance and capacity of pure MoS<sub>2</sub> reported in previous works.

| Typical materials | Current density<br>(mA g <sup>-1</sup> ) | Cycle number | Remaining capacity<br>(mAh g <sup>-1</sup> ) | Ref.      |
|-------------------|------------------------------------------|--------------|----------------------------------------------|-----------|
| Nanorods          | 200                                      | 100          | 776                                          | 1         |
| nanosheets        | 100                                      | 60           | 698                                          | 2         |
| nanoparticles     | 100                                      | 30           | 900                                          | 3         |
| Microspheres      | 100                                      | 70           | 672                                          | 4         |
| Nanosheets        | 100                                      | 30           | 530                                          | 5         |
| Nanosheets        | 1C                                       | 50           | 860                                          | 6         |
| Nanospheres       | 100                                      | 30           | 706                                          | 7         |
| Nanosheets        | 100                                      | 20           | 936                                          | 8         |
| Nanowires         | 100                                      | 50           | 952                                          | 9         |
| Nanoparticles     | 50                                       | 50           | 900                                          | 10        |
| Hollow nanotubes  | 100                                      | 100          | 727                                          | This work |
| Nanoflowers       | 100                                      | 100          | 520                                          | This work |

[1] *ACS appl. Mater. Interfaces*, 2012, **4**, 3765.

[2] *Chem. Eur. J.*, 2011, **17**, 13142.

[3] *Chem. Commun.*, 2013, **49**, 1823.

[4] *Nanoscale*, 2012, **4**, 95.

- [5] *Dalton Trans.*, 2013, **42**, 2399.  
[6] *Inorg. Chem.*, 2013, **52**, 9807.  
[7] *CrystEngComm*, 2012, **14**, 8323.  
[8] *CrystEngComm*, 2013, **15**, 4998.  
[9] *Adv. Mater.*, 2013, **25**, 1180.  
[10] *Chem. Mater.*, 2010, **22**, 4522.

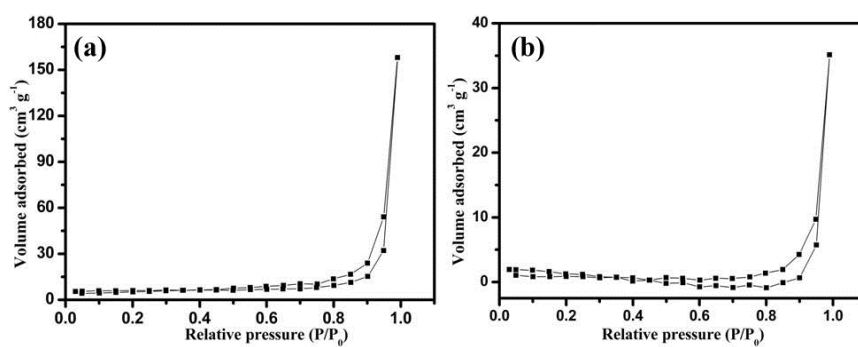

Fig. S1. N<sub>2</sub> adsorption-desorption of the (a) MoS<sub>2</sub> nanotubes and (b) nanoflowers.

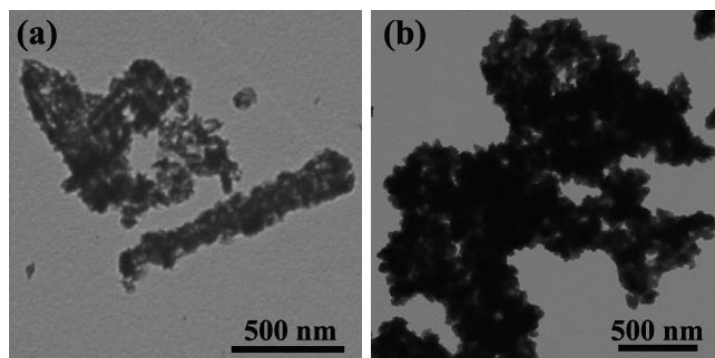

Fig. S2. TEM images after 100 cycles: (a) MoS<sub>2</sub> nanotubes and (b) MoS<sub>2</sub> nanoflowers.
